# Supplementary material
Source: PubMed Central journal article supplement (PMC1855805)
Supplement: jbacter_189_7_2637__1.pdf [file jbacter_189_7_2637__1.pdf]

**Table 1S.** Oligonucleotide primers used in this study.

| Name          | Sequence <sup>a</sup>                 |
|---------------|---------------------------------------|
| BA00465'Kpn   | TATTAG <u>GGTACCGG</u> TATCCTCTGGATG  |
| BA00463'Bam   | TAGAT <u>GGATCCTT</u> TCTGAATCTAG     |
| BA00463'Bam2  | ATCCGTAGGATCCAACGAGATAGATC            |
| BA00465'Nde   | TTCATTTCA <u>CATATGA</u> ACGTAACGAAAC |
| BA18775'EcoRI | TAAACGAATTCCTTTCTATATTATC             |
| BA18773'Bam   | CAGTTGGATCCGAAATTCCATTACAC            |
| BA18773'Bam2  | GAAAGGGATCCTAATGTGTACTTCCT            |
| BA18775'Nhe   | TGAATGGCTAGCGTAAAAAGGAAGTAC           |
| BA11875'ScaII | CTTTGTCCGCGGAAGAAAAGGCATAACAG         |
| BA18773'SalI  | ATATAGTCGACTTATTATACTTCCATGC          |
| BA18775'SalI  | GGCGAAGTCGACTGGCTGGTTTTATG            |
| BA18773'Xho   | CATCGAACTCGAGATAAACGAATTAATG          |
| BA24165'Kpn   | AGAGAGGTACCGATTTGTTATGAATATG          |
| BA24163'Bam   | TCCCCGGATCCTGAAATGTACGTATG            |
| BA24165'Nde   | GAAGTAAAACCATATGGAATTAGTGAAATTGG      |
| BAYisi5'Eco   | TAATTGAATTCGCATCCGTAAGAAAAAAAC        |
| BAYisi3'Bam   | TACAAGGATCCTTTCGTTTTTAAAATAAAC        |
| BAYisi5'Nde   | CGATTCATATGTTTGAGCAAGCG               |
| BAYisi3'SalI  | ATCGCGTCGACAAACATTGAAATCGGCTC         |
| BAYisi3'Sal2  | CCATAGTCGACAGCAAAATAAATCATTTTTTTCAC   |

a) Regions underlined denote the restriction site.

### **Legend to Supplementary Figures**

**Figure 1S:** MALDI TOF analysis of the BAYisI protein isolated from *E. coli*. The sequence of one possible protein resulting from the frameshift repair is shown with the His-tag sequence at the N-terminal end. The predicted molecular weight of this protein is also shown.

**Figure 2S:** Phosphorelay dephosphorylation assay. Purified Spo0E-like proteins of *B. anthracis* were tested for their ability to dephosphorylate KinA (0.2 $\mu$ M) or Spo0F (2.5 $\mu$ M). BA1877, BA0046, BA2416 and BAYisI were added at 5 $\mu$ M final concentration. The reactions were initiated by the addition of ATP. Aliquots were withdrawn at the indicated times. The position of the phosphorylated KinA and Spo0F proteins is indicated by the arrows. The asterisk denotes a dimer form of Spo0F.

**Figure 3S:** Quantitation of residual phosphorylated Spo0A in the phosphorelay reactions in the presence of the *B. anthracis* Spo0E-like proteins. The 0' and 5' time points of the reaction shown in Figure 3 were quantitated using the ImageQuant software (Molecular Dynamics/Amersham). The phosphorylation level was measured in pixel and expressed as a percentage of the phosphorylation level of Spo0A in the corresponding time point of the control reaction carried out without the phosphatase.

BAYisl (predicted MW 9,255.35)

MGSSHHHHHHSSGLVPRGSHMFEQAIEKKREKMIYFAERYGMTSQKTVDCSQELDRLLNVIWHVHTDVHPNQTLDTHTQ

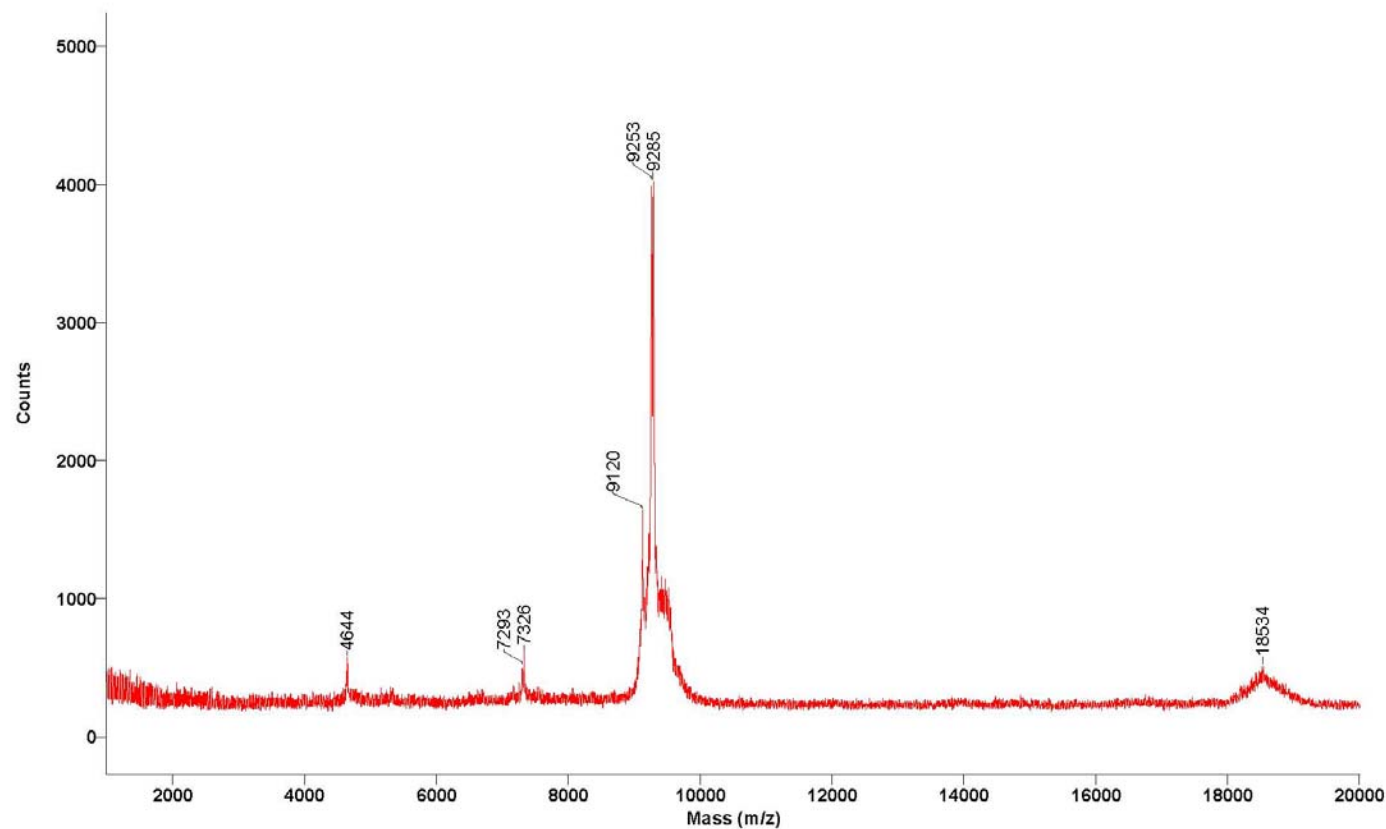

**Bongiorni et al.  
Fig.1S**

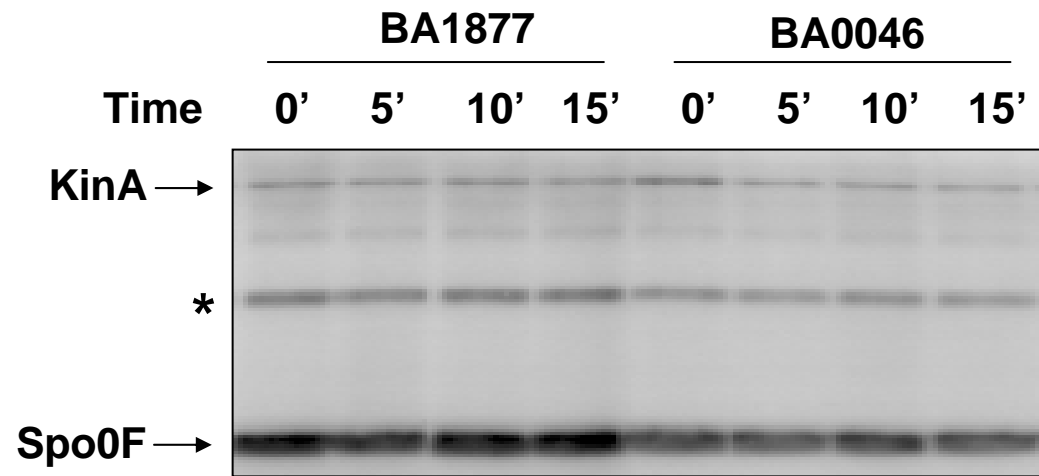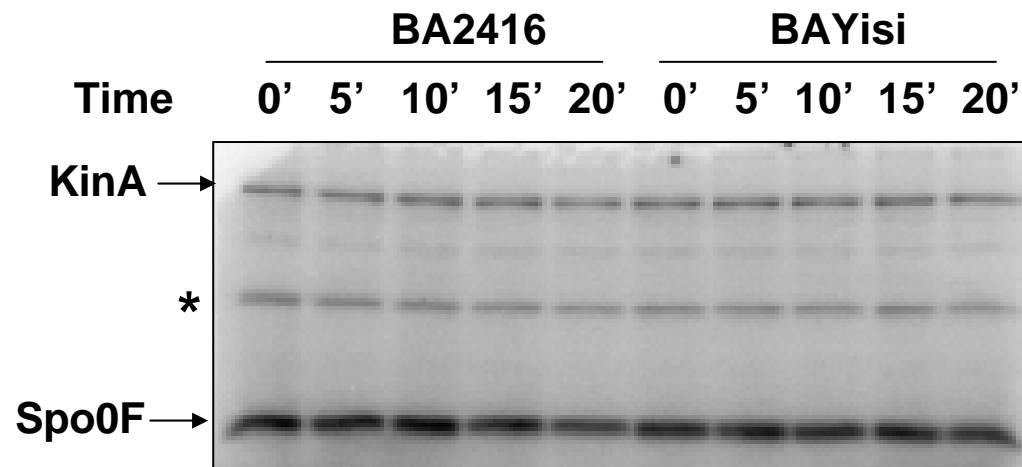

Bongiorni et al.  
Fig.2S

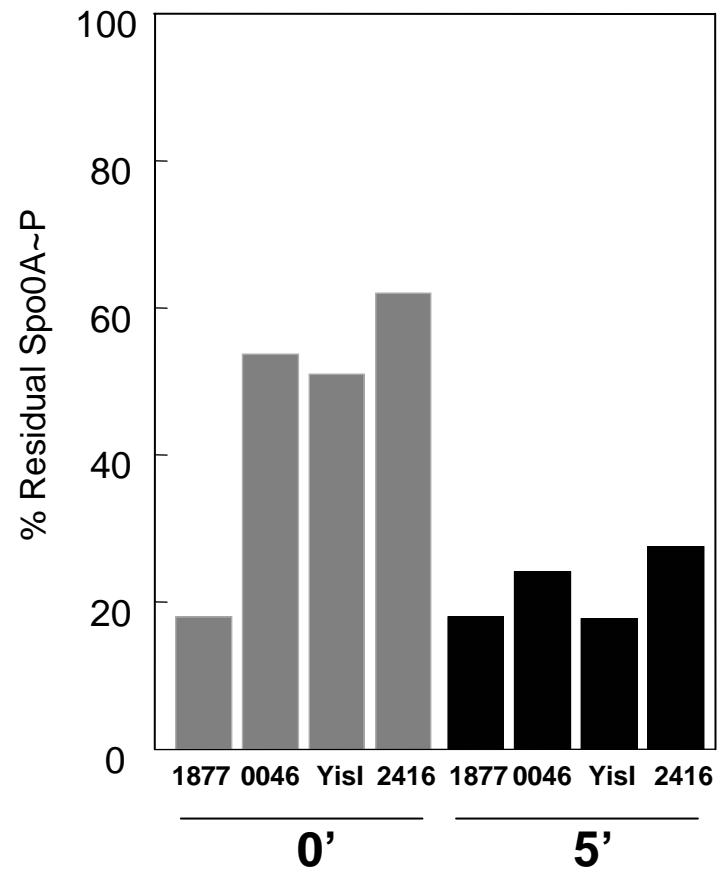

**Bongiorni et al.  
Fig.3S**
